# Supplementary material for: Cigarette smoking and reasons for leaving school among school dropouts in South Africa
Source: Springer Nature journal article supplement (doi:10.1186/s12889-019-6454-5), 2019-01-30

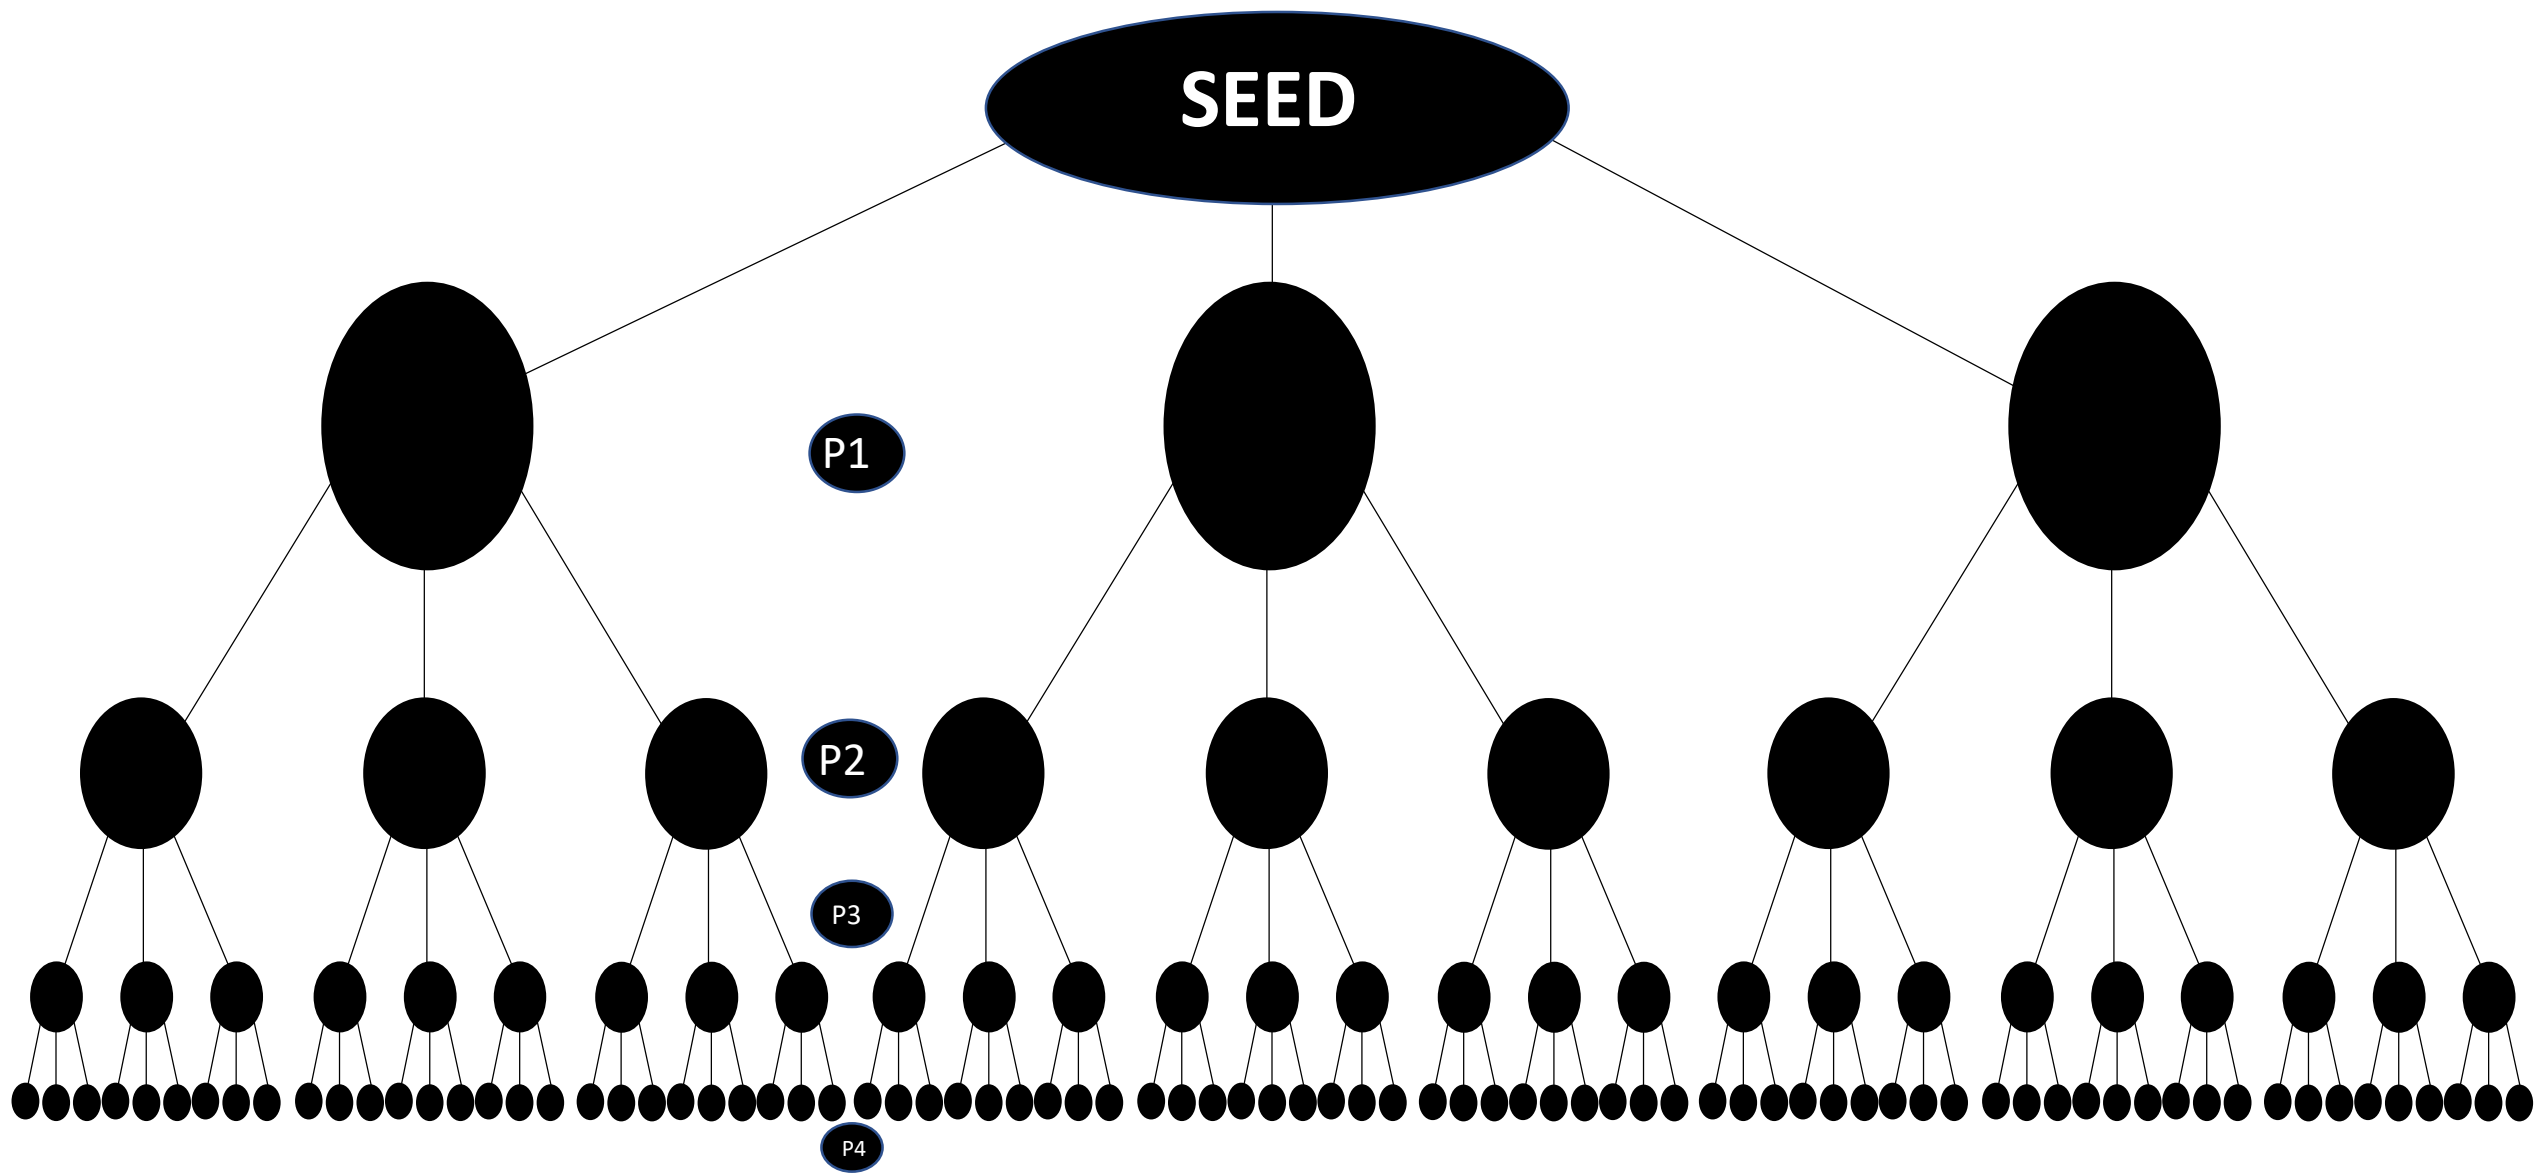

Supplement: MOESM1 [file 16430948]
